# Supplementary material for: Lactobacillus reuteri's multifaceted role in mitigating ionizing radiation-induced injury inDrosophila melanogaster
Source: Royal Society of Chemistry journal article supplement (doi:10.1039/d3fo05422e), 2024-01-01
Supplement: d3fo05422e1.xlsx [file d3fo05422e1.xlsx]

## Sheet: Survivorship
Time(Days)	N♀	N ♂	IR♀	IR ♂	B6+IR+B ♀	B6+IR+B ♂	mix6+IR+mix ♀	mix6+IR+mix ♂	S6+IR+S ♀	S6+IR+S ♂	IR+B ♀	IR+B ♂	IR+mix ♀	IR+mix ♂	IR+S ♀	IR+S ♂
0	100	100	100	100	100	100	100	100	100	100	100	100	100	100	100	100
2	100	100	99	100	76	81	91	92	85	83	97	97	94	95	93	97
4	93	97	93	98	72	81	83	90	80	80	88	95	90	93	91	96
6	88	95	65	97	71	79	79	89	75	77	82	94	88	92	89	96
8	84	91	47	97	70	77	77	88	73	77	81	93	85	92	89	96
10	79	84	35	95	67	77	77	88	72	74	76	91	78	92	85	94
12	75	84	25	93	65	75	72	85	69	72	71	91	74	91	77	94
14	73	76	24	93	62	73	69	79	67	70	65	89	67	90	77	94
16	63	72	20	89	56	73	65	75	65	69	58	86	65	88	75	94
18	38	70	13	86	53	72	61	73	63	69	54	79	56	86	69	89
20	38	65	11	83	51	69	56	72	57	69	54	79	53	83	67	87
22	38	60	11	79	47	62	52	70	52	66	54	76	51	82	62	84
24	35	37	10	76	42	59	46	69	49	62	50	68	45	75	53	77
26	33	34	10	74	40	50	41	55	45	52	49	63	43	69	41	62
28	32	33	10	71	33	45	37	37	36	41	41	47	43	63	40	58
30	24	17	9	55	32	37	36	36	35	38	35	24	43	26	38	21
32	17	6	9	28	31	34	35	33	33	35	20	0	39	0	30	0
34	15	6	9	15	30	10	30	20	26	17	18		35		26
36	12	5	9	14	30	10	29	0	25	16	17		35		24
38	9	4	9	12	28	8	29		23	15	13		34		22
40	3	4	8	9	19	4	12		17	0	3		30		17
42	2	2	7	8	13	0	5		0		3		27		17
44	1	0	7	0	12		0				0		9		9
46	0		0		12								7		8
48					11								6		5
50					10								5		4
52					8								0		0
54					0

## Sheet: Median survival(d) ♀
N	IR	+IR+B	+IR+mix	+IR+S	N	IR	B6+IR+B	mix6+IR+mix	S6+IR+S
22	6	24	24	24	22	8	22	24	24
24	8	26	22	26	21	9	23	23	26
20	4	24	26	28	23	7	24	25	22

## Sheet: Median survival(d) ♂
N	IR	+IR+B	+IR+mix	+IR+S	B6+IR+B	mix6+IR+mix	S6+IR+S
24	18	26	30	28	27	28	28
22	20	28	32	32	28	26	27
26	16	30	28	30	26	30	29
